# Supplementary material for: Neighborhood Built Environment Measures and Association with Physical Activity and Sedentary Time in 9–14-Year-Old Children in Saskatoon, Canada
Source: MDPI journal article supplement (doi:10.3390/ijerph17113837), 2020-05-28
Supplement: s1 [file s1]

## Supplementary:

**Table S1.** Descriptive statistics of neighborhood perceived, and researcher-rated BE measures.

| Neighborhood Researcher-Rated<br>BE Measures | Mean (S.D)  | Different Neighborhood BE<br>Features (Perception) | Yes (%) |
|----------------------------------------------|-------------|----------------------------------------------------|---------|
| NALP (scale 1–6)                             |             | Positive perception                                |         |
| NALP activity friendliness                   | 3.79 ± .49  | Sidewalk                                           | 70.7    |
| NALP density of destinations                 | 3.72 ± .78  | Street lighting                                    | 94.7    |
| NALP safety                                  | 3.90 ± .39  | Less traffic                                       | 86.6    |
| NALP universal accessibility                 | 2.18 ± .64  | Road safety                                        | 90.1    |
| IMI (scale 1–10)                             |             | Parks                                              | 89.9    |
|                                              |             | PA role models                                     | 96.8    |
|                                              |             | Negative perception                                |         |
| IMI attraction                               | 4.82 ± .34  | Scary dogs                                         | 33.9    |
| IMI diversity of destinations                | 5.34 ± 2.56 | Road crossing difficulties                         | 93.1    |
| IMI pedestrian accessibility                 | 5.17 ± .46  | Criminal activities                                | 92.2    |
| IMI safety from crime                        | 8.72 ± .94  | Hilly roads                                        | 88.5    |
| IMI safety from traffic                      | 6.32 ± .88  |                                                    |         |

Description of BE audit tools: NALP consists of 22 items within four areas: Activity Friendliness, Safety, Density of Destinations, and Universal Accessibility. Using this method, observers rated each item on a 6-point scale after walking a pre-defined route in each neighborhood that connected 10 randomly selected street segments. IMI consists of a 229-item inventory of neighborhood features within five areas (on a 10-point scale): Attractiveness, Diversity of Destinations, Pedestrian Access, Safety from Traffic, and Safety from Crime. Twenty percent of street segments in each neighborhood were randomly selected and observed. Each segment consists of two facing sides of a street block and is indicated by a numbered flag on the map. The NALP tool is more subjective in nature and it takes into account the impression of the entire neighborhood based on the systematic observations of the researchers. In contrast, the IMI is more objective in nature and is based on observations of each individual segment.

### Descriptive statistics:

**Researcher-rated BE Measures:** For example, out of a possible highest rating of 10, neighborhoods in Saskatoon, Canada, on average, rated as 8.72 for safety from crime (IMI). Out of a possible highest rating of 6, neighborhoods in Saskatoon, on average rated 3.90 for Safety (NALP).

**Perceived BE Measures:** For example, 70.7% of children report that their neighborhoods have sidewalks (in terms of positive perception). In contrast, 33.9 % children report that they observed scary dogs in their neighborhoods which they find a safety issue (in terms of negative perception).

**Table S2.** Perceived BE variables used in the study and their component survey.

| <b>Survey Component</b>               | <b>Variables Recoded/Used in the Study</b>                                   |
|---------------------------------------|------------------------------------------------------------------------------|
| Sidewalk (yes/no)                     | Same                                                                         |
| Less traffic (yes/no)                 | Same                                                                         |
| Scary dog or people                   | Absence of social/physical disorder (no unattended/scary dogs/unsafe people) |
| Parks                                 | Same                                                                         |
| Street lighting                       | Same                                                                         |
| Criminal activity                     | Concerns about crime                                                         |
| Crossing road safely                  | Road safety                                                                  |
| Seeing others being physically active | Physical activity role model                                                 |
